28 attack speed. However, this effect was detected only immediately before the predation  
29 event; connectivity two and four days before prey capture had little impact on the collective  
30 dynamics. Significantly, lower social proximity of the group's boldest individual to other  
31 group members (closeness centrality) immediately prior and two days before prey capture  
32 was associated with faster attack speeds. These results suggest that for adult spiders, the  
33 long-lasting effects of the boldest individual on the group's attack dynamics are mediated by  
34 its role in the social network, and not only by its boldness. This suggests that behavioural  
35 traits and social network relationships should be considered together when defining  
36 keystone individuals in some contexts. By contrast, for subadult spiders, while the group  
37 maximum boldness was negatively correlated with latency to attack, no significant resting  
38 network predictors of latency to attack were found. Thus, separate behavioural mechanisms  
39 might play distinctive roles in determining collective outcomes at different developmental  
40 stages, timescales, and levels of social organization.

41

## 42 **Introduction**

43 Group living can benefit group members through access to mates, protection from  
44 predators, and increased foraging opportunities (Krause and Ruxton 2002). A variety of  
45 animals engage in cooperative hunting to capture prey that is larger than what they could  
46 capture alone. Examples of cooperative hunting can be seen in chimpanzees (Boesch 2002),  
47 lions (Stander 1992), wild dogs (Creel and Creel 1995), hawks (Bednarz 1988), killer whales  
48 (Pitman and Durban 2012) and invertebrates such as ants (Witte et al. 2010), and social  
49 spiders (Whitehouse and Lubin 1999). During collective prey capture, individuals often  
50 coordinate their behaviour through social interactions, to maximize their capture success  
51 (Stander 1992; Boesch 2002; Pitman and Durban 2012). A shorter latency to attack can

52 reduce the time and effort needed to capture prey, and increases the probability of success,  
53 thus conferring important fitness benefits to all group members (Pasquet and Krafft 1992).  
54 In addition to coordination through social interactions, groups often rely on particular  
55 individuals to expedite collective dynamics (Modlmeier et al. 2014b).

56 Social network analysis provides tools to quantify interaction patterns and has been  
57 instrumental in understanding the dynamics and outcomes of interactions within groups  
58 (Wey et al. 2008; Kurvers et al. 2014; Pinter-Wollman et al. 2014; Krause et al. 2015) and in  
59 predicting group success (Royle et al. 2012). Different network measures can describe  
60 interactions occurring at various organizational levels, such as an individual's direct  
61 interactions with its neighbours, links within a subgroup, or interactions at the whole group  
62 level (Lusseau and Newman 2004; Wittemyer et al. 2005; Krause et al. 2007; Wey et al.  
63 2008). The social structure of animal groups often changes over time, and interaction  
64 patterns occurring in one period can impact the group later (Blonder et al. 2012; Pinter-  
65 Wollman et al. 2014; Krause et al. 2015). For example, social connectivity early in life can  
66 predict male mating success several years later in long-tailed manakins (McDonald 2007),  
67 social connections to relatives can persist for longer than relationships with non-kin in  
68 spotted hyenas (Holekamp et al. 2012), and social stability of subgroups can be maintained  
69 over years in sparrows (Shizuka et al. 2014). Thus, temporal dynamics of interactions may  
70 occur at different rates at different organization levels (Blonder et al. 2012).

71 Animals within a society often differ from one another in their behaviour, and these  
72 differences can be consistent over time, a phenomenon that has been referred to as  
73 'personality' (Sih et al. 2004; Bell et al. 2009; Jandt et al. 2014). Behavioural variation  
74 among individuals in a social group can have a considerable impact on group functions  
75 (Pinter-Wollman 2012). Only a small amount of variation among individuals may be

76 necessary to have large impacts on the entire group. In the most extreme situations just one  
77 'keystone' individual, such as a leader or a tutor, may have a disproportionate impact on the  
78 group (Conradt and Roper 2003; Modlmeier et al. 2014b). A keystone can be either a  
79 particular individual or a role that different individuals assume at different times  
80 (Modlmeier et al. 2014b). Keystone individuals can have an increased interaction rate with  
81 other group members (Lloyd-Smith et al. 2005) and their behavioural tendencies can  
82 influence interaction patterns (Pike et al. 2008; Sih et al. 2009; Krause et al. 2010; Pinter-  
83 Wollman et al. 2011; Firth et al. 2015), thus in turn impacting collective actions (Bansal et al.  
84 2007; Brown and Irving 2014). It is still unknown how keystone individuals influence the  
85 performance of a group. Generally speaking, keystone individuals can either perform the  
86 work itself or catalyse the work of other group members (Robson and Traniello 1999), for  
87 example through social interactions.

88         Individual differences that are consistent over short time frames may change over  
89 longer periods (Stamps and Groothuis 2010). Such changes can alter the relationship  
90 between a group's personality composition and collective outcomes over time. For example,  
91 in social insects the task that each individual performs can change with age (Seeley 1982;  
92 Tripet and Nonacs 2004) potentially altering the distribution of task performance in the  
93 colony. Changes to an animal's personality may arise from changes in physiological  
94 processes such as growth (Biro and Stamps 2008), metamorphosis (Hedrick and Kortet 2012;  
95 Wilson and Krause 2012), or sexual maturation (Stamps and Groothuis 2010). Personality  
96 may also develop due to changes in the external physical or social environment over time,  
97 i.e. experiential factors (Stamps and Groothuis 2010). For example, as group members  
98 become familiar with one another, variation among individuals increases and variation

99 within an individual decreases, thus increasing behavioural repeatability (Laskowski and  
100 Pruitt 2014; Modlmeier et al. 2014c; Laskowski et al. 2016).

101 In the social spider *Stegodyphus dumicola* (Araneae, Eresidae) individuals vary in  
102 their boldness, and the boldest individual in the colony (referred to as the keystone) affects  
103 foraging intensity (attack speed and number of attackers) and mass gain of the entire group  
104 (Keiser and Pruitt 2014; Pruitt and Keiser 2014). It is not known how the influence of  
105 keystone individuals is imparted in this species, only that keystones have long lasting  
106 effects, and that the duration of their impact is proportional to the tenure of the keystone in  
107 the group (Pruitt and Pinter-Wollman 2015). A recent model (Pinter-Wollman et al. 2016)  
108 predicts that when the boldness of group members is persistent (i.e., is a stable personality  
109 trait), social interactions should play a larger role than boldness in shaping collective  
110 outcomes. This prediction emerges because who interacts with whom would change more  
111 rapidly than boldness if it was highly stable, and boldness does not necessarily determine  
112 who interacts with whom (Hunt et al. 2018). In contrast, if boldness is plastic, social  
113 interactions may play a smaller role in determining collective outcomes because changes in  
114 the collective outcomes can emerge from changes in boldness. Younger animals are often  
115 more behaviourally plastic than adults (Scott 1962). Thus, by comparing the social behaviour  
116 of both subadult, or juvenile, and adult organisms, we can test when social interactions and  
117 when behavioural traits, i.e. boldness, have a larger impact on collective outcomes (Pinter-  
118 Wollman et al., 2016).

119 *S. dumicola* spiders live in colonies of up to several hundred individuals of the same  
120 age that exhibit cooperative behaviours such as prey capture and allo-maternal care (Bilde  
121 et al. 2007; Junghanns et al. 2017). Enhanced foraging success is thought to be a primary  
122 driver of sociality in social spiders (Whitehouse and Lubin 2005), to enable subduing of large

123 prey items (Guevara et al. 2011; Harwood and Avilés 2013). More frequent co-feeding  
124 interactions of the same prey item has been observed in sibling groups compared with non-  
125 sibling groups in group-foraging subsocial spiders, suggesting that social network structure  
126 may play a role in the evolution of social behaviour in spiders (Ruch et al. 2015). Colonies  
127 composed of bolder spiders attack more rapidly (Keiser et al. 2014; Keiser and Pruitt 2014;  
128 Pruitt and Keiser 2014) and with more individuals (Grinsted et al. 2013; Keiser and Pruitt  
129 2014; Laskowski and Pruitt 2014; Pruitt and Keiser 2014) than colonies with shy individuals.

130 Here we use social network analysis to determine the temporal scale and the social  
131 organization level at which interactions between group members have the most impact on  
132 collective prey capture dynamics. We evaluate if the keystone individual influences the  
133 group through its role in the group's social network. We also consider whether these social  
134 interactions have long-lasting effects on prey capture success, or if the impact of  
135 interactions is immediate and ephemeral. Furthermore, we examine if developmental stage  
136 (subadults vs. adults) affects the relationships between personality, social interactions, and  
137 collective prey attack. Comparing subadults, with more plastic, emergent personalities, to  
138 adults, with more established personalities, allows us to test the predictions of the model of  
139 keystone influence detailed above (Pinter-Wollman et al. 2016).

140 In sum, we consider whether the speed at which *S. dumicola* colonies of either  
141 subadult or adult spiders collectively attack prey depends on: (i) interactions occurring at  
142 different levels of social organization; (ii) temporal changes in social structure; and (iii) the  
143 behavioural and social attributes of the keystone individual.

144

## 145 **Methods**

146 *Animal collection and maintenance*

147 Colonies of *S. dumicola* were collected from roadside *Acacia* trees in the Northern Cape of  
148 South Africa in November 2015 (subadults) and March 2016 (adults), transported to the  
149 laboratory, and fed crickets *ad lib*. The size of collected colonies ranged between 70-300  
150 individuals and contained only females - males are short-lived and rare (12%) in natural  
151 colonies (Henschel et al. 1995). We created 15 groups of 26-30 sub-adult female spiders,  
152 from 4 source colonies of subadults, and 24 groups of 10 adult female spiders each, from 3  
153 other source colonies. Individuals from different source colonies were not mixed. Group  
154 sizes were larger for subadults because of the small size of those individuals, and because it  
155 potentially requires more small individuals to execute a successful attack on large prey (see  
156 supplementary Figure S2 for differences in sizes between adults and subadults). The  
157 behavioural composition of these groups is detailed below in the '*Group composition*'  
158 section. Groups were housed in large round containers (18cm diameter, 8cm depth for  
159 subadults and 11cm diameter, 10cm depth for adults) with vertical wire meshes (two 9x6cm  
160 sheets positioned 10cm apart for subadults and a 5x5cm sheet for adults) to allow the  
161 spiders to build both a retreat and a capture web. Trials were conducted from January until  
162 August, 2016.

163

#### 164 *Experimental procedure*

165 To determine the effect of interaction patterns at different time scales on prey attack we  
166 observed groups over time. Each group was observed for 6.5 weeks. Boldness and prey  
167 capture were measured once a week and resting interactions, as detailed below, were  
168 observed three times a week with 2-3 days separating each observation. The first resting  
169 network was obtained immediately before measuring boldness on Day 4, numbered as four  
170 days before measuring prey attack. The second resting network was observed on Day 2, two

171 days after measuring boldness and two days before measuring prey attack. The third resting  
172 network was observed immediately before testing prey attack speed, on Day 0. This spacing  
173 of measures allowed ample time for the spiders to recover from disturbances due to  
174 removing them from their web to determine boldness. Each group was fed with a single 4-  
175 week-old cricket once a week, which provides *ad lib* food, after the prey assay (described  
176 below), hence all colonies had an equal opportunity to consume prey, and were at a similar  
177 state of hunger. We obtained 7 boldness measures for each individual spider, 6 collective  
178 prey capture response measures for each group, and 18 resting networks for each group (19  
179 including a final boldness/network observation not used here). We compared the predictive  
180 power of the resting networks observed four days, two days, and immediately before each  
181 prey capture trial, for explaining the speed of prey attack. This allows us to differentiate  
182 between short term (immediately before prey attack), medium (two days), and long (four  
183 days) term influences of spider interaction networks.

184

#### 185 *Boldness*

186 To determine individuals' boldness, each spider was tested once a week using an  
187 established assay that measured the recovery of a spider from exposure to air puffs, which  
188 mimic the approach of an avian predator (Riechert and Hedrick 1993). Spiders react to the  
189 air puffs by huddling and remaining still. The faster the spiders resume movement after this  
190 simulated threat, i.e., move one body length away from where they were huddled, the  
191 bolder they are considered. Bolder spiders tend to participate more in collective prey  
192 attacks than shy individuals (Lichtenstein et al. 2017). Boldness is a repeatable behaviour in  
193 this species when spiders are kept isolated over days, with a repeatability of 0.63 (Keiser et  
194 al. 2014). However, in a social context, boldness is much more plastic and changes as a



195 function of the boldness of the individuals with whom one interacts and over time (Hunt et  
196 al. 2018) and may be related with metabolic rate (Lichtenstein et al., 2017). To test  
197 boldness, spiders were placed individually in a plastic container (15x15cm) and after 30s of  
198 acclimation, two puffs of air were administered to the anterior prosoma using an infant  
199 nose-cleaning bulb. Boldness was measured as the latency to resume movement and move  
200 one body length. Because bolder individuals resume movement faster, we subtracted the  
201 time to resume movement from the maximum duration of the procedure (600s) to create a  
202 metric that increases with boldness. We designated as 'shy' individuals those with a latency  
203 to resume movement of 400-600s, while 'bold' individuals were those with a latency to  
204 resume movement of 0-200s. The abdomen of each spider was marked uniquely with acrylic  
205 paint to track their behaviour over time (Figure 1). We examined how many individuals  
206 occupied the role of keystone (boldest) in each experimental group over the 7 weeks of the  
207 experiment – this ranged from 1 to 7 individuals (same individual throughout, or a different  
208 individual each week). A priori, turnover is expected to be higher for the subadults because  
209 they have larger group sizes and therefore more individuals that might replace the keystone  
210 individual. We compare the keystone turnover for the two developmental stages using a  
211 Wilcoxon rank sum (Mann-Whitney) test. We used linear interpolation to obtain an  
212 estimate of boldness on Days 0 and 2 and identify a putative boldest individual on those  
213 days, which were in between the weekly boldness measurement taken on Day 4.

214

### 215 *Group composition*

216 To examine the effect of group composition on collective behaviour we assigned spiders to  
217 one of three group compositions: all shy, all bold, and 'keystone' (all shy individuals plus one  
218 bold individual). For subadults, we established five groups of each composition and for

219 adults we established five groups of all bold, nine of all shy, and ten keystone groups.  
220 Individuals that were not assigned to experimental groups, including those with a boldness  
221 score of 200-400, were returned to their source colony. After the first week of our study,  
222 the average boldness of all group compositions converged, with the 'all bold' groups  
223 reducing their average boldness substantially and the other two group types increasing their  
224 average group boldness slightly (Figure S1 A, B). Boldness during week 1 was the boldness  
225 recorded before creating the experimental groups, thus before individuals interacted with  
226 one another. We used a one-way ANOVA to compare mean group boldness of the three  
227 different group compositions, for the latter five weeks of our experiment, excluding week  
228 one. Because we did not detect a significant difference in average boldness between the  
229 three compositions for the latter five weeks (subadults:  $F_{2,71}=0.739$ ,  $p=0.48$ ; adults:  
230  $F_{2,117}=2.076$ ,  $p=0.13$ ), we excluded week one and pooled the remaining data across  
231 compositions in all analyses (see also distribution analysis in Table S1). Because boldness  
232 was found to be more plastic in a social context compared with isolation, and because the  
233 artificially manipulated boldness distributions were quickly returned to their natural skewed  
234 state by the spiders' collective boldness dynamics, we did not find evidence that our  
235 treatments had any long-term effects. For further information on changes in boldness over  
236 time in a social context see Hunt et al. 2018.

237

### 238 *Social interactions*

239 The physical contacts among spiders were manually recorded three times a week:  
240 immediately (1-2 hours) before the prey-capture assay, two days prior to the prey capture  
241 assay, and four days before to the prey capture assay. Resting interactions were defined as  
242 a physical contact between any body parts of two spiders (Figure 1). Interactions were

243 observed during the day, when spiders are resting and inactive, which is their condition  
244 most of the time, unless disturbed by a prey in their web or by a destruction of their web  
245 that requires maintenance. Care was taken to note each spider in the colony so that all  
246 interactions are recorded. These interactions were used to construct social networks and  
247 calculate network variables that indicate individual, sub-group, and group level dynamics.  
248 The network variables measuring individual level behaviours were keystone degree,  
249 keystone closeness, and maximum boldness in the group (i.e., boldness of the keystone); for  
250 the sub-group level, modularity; and for the group level, average degree and degree  
251 distribution skewness, as detailed in Table 1.

252 To calculate the 2 individual-level network measures (Table 1), we had to first  
253 identify which individual was the boldest, i.e. occupying the keystone role each week. In this  
254 system, the individual with the highest boldness assumes the keystone role, regardless of its  
255 identity (Pinter-Wollman et al. 2017b). Thus, the role of keystone is not necessarily  
256 maintained by a specific individual. In a social setting, individuals change their boldness over  
257 time (Hunt et al. 2018) and so boldness ranks among individuals may also shift. When more  
258 than one spider exhibited the same maximum value, we took the average network value of  
259 those individuals (this happened 2 out of 74 times for the subadult spiders and 1 out of 120  
260 times for the adults). When all spiders had zero boldness, we identified the keystone  
261 individual as the boldest spider in the previous week (this did not occur for the subadults,  
262 and 13 out of 120 times for the adults); where this was not possible, we calculated network  
263 values as an average across all individuals in the group that week (7 out of 120 times for the  
264 adults).

265

266 *Prey response*

267 To determine the speed at which groups attacked prey collectively, we examined the  
268 groups' latency to respond to vibrations on their capture web (Grinsted et al. 2013). We  
269 used a custom-made vibratory device assembled from an Arduino Uno board, a vibratory  
270 motor, and a metal wire, directed at a 1x1cm piece of paper placed in the capture web  
271 (Pinter-Wollman et al. 2017b). The stimulus was always placed on the capture web at the  
272 same distance (4cm) from the nest retreat, where most spiders were gathered, to control  
273 for any effects the distance of the stimulus might have on the response of the group. The  
274 Arduino board was programmed to vibrate the piece of paper in pulses that varied  
275 randomly between 0.5-1.5 sec in both the duration of the vibration and the pauses between  
276 vibrations, to simulate the irregular vibrations that a prey makes when captured in the web  
277 (Hedrick and Riechert 1989). The paper was vibrated until a spider touched it, to avoid  
278 habituation to our stimulus, or until 10 minutes elapsed, in which case the trial was stopped  
279 (Pinter-Wollman et al. 2017b). As the first individual left the retreat, others followed,  
280 creating a collective response. The first individual to leave the retreat was not necessarily  
281 the one closest to the simulated prey (personal observations). When no attack took place,  
282 we set the latency to attack to ten minutes. We noted the identity of the first individual(s)  
283 to touch the stimulus, as well as the identity of all the individuals that left the nest during  
284 the attack as participants, so that we could assess whether the keystone (boldest) individual  
285 participated in prey attack. Both adult and subadult groups responded to the simulated prey  
286 in a similar manner (Figure S3).

287

### 288 *Data analysis*

289 To examine the relationship between social network structure, boldness, and prey attack we  
290 used censored mixed regression models. We considered six variables as predictors of

291 latency to attack, as detailed in Table 1. These were included as fixed effects interacting  
292 with the effect 'Day' which accounted for the number of days before the attack assay (4, 2,  
293 or 0). This approach allowed us to determine the timescale on which social interactions act  
294 on prey capture. We constructed separate models for adult and subadult spider behaviour,  
295 and each model included 5 weeks of data (weeks 2-6, excluding week 1). For the adult  
296 spiders these included N=360 resting network observations (24 colonies x 5 weeks x 3  
297 observations per week) and for the subadults N=224 (15 colonies x 5 x 3, except N=74 for  
298 Day 0 because of 1 missing network observation). Because latency to attack was right-  
299 censored at 600 s, with 76% of subadult trials and 65% of adult trials resulting in an attack,  
300 we used censored regression (Tobit) models with the R package 'censReg' (Henningsen,  
301 2017). The response variable, latency to attack, was log-transformed to adhere to the model  
302 assumption that the error term is normally distributed. To account for variation among  
303 groups and source colonies we included group identity as a random effect and source  
304 colony identity as a fixed effect. We further included a time-varying residual component as a  
305 random effect to account for changes over the 5 weeks. Because we did not have an *a priori*  
306 prediction regarding which network variable would best explain collective prey attack, we  
307 identified a suitable model for the adults and subadults by first estimating all 63 possible  
308 models that linearly combined one or more (i.e., not including interactions) of the 6 fixed  
309 effects listed in Table 1. We calculated the Akaike weight of the 63 models (Burnham et al.,  
310 2011). These model weights were then used to estimate the relative importance of the six  
311 predictor variables under consideration (Table 1). The importance of each predictor is  
312 determined by summing the Akaike weights of each model in which it appears (Symonds  
313 and Moussalli 2011). If a certain predictor appears in many of the top models, its summed  
314 Akaike weight will tend toward 1. On the other hand, if it only appears in the weaker

315 models, its weight will tend toward 0 (Symonds and Moussalli 2011). This procedure results  
316 in a ranking of predictor variables in terms of performance, and one can interpret the  
317 predictor weight as a probability that it is a component of the best model (Burnham and  
318 Anderson 2002; Symonds and Moussalli 2011). We selected the top-ranked predictor  
319 variable at the individual level, and the top-ranked predictor at the group or subgroup level,  
320 to obtain a parsimonious model for the adult and subadult behaviour with two main  
321 predictors in each model (Tables 2, 3, 4). We find this predictor-ranking approach to be  
322 preferable to full-model averaging because it allows us to identify a particular model with  
323 properly estimated predictor standard errors and without excessive model complexity (full-  
324 model averaging results are available in Table S7, S8). We checked for multicollinearity  
325 between predictors in the final models by calculating their corrected generalized variance  
326 inflation factors (Fox and Monette 1992), using the R package 'car' (Fox and Weisberg 2011).  
327 There was low collinearity in both the adult model (Table S3) and subadult model (Table S5).  
328 To assess whether the keystone spider's role in the interactions network (closeness and  
329 degree) was correlated with its boldness we calculated the Pearson's correlation between  
330 these measures.

331

## 332 **Results**

333 The adult spider model included average degree (predictor weight 46%), as the group or  
334 subgroup-level fixed effect, and closeness of the keystone individual (predictor weight 81%),  
335 as the individual-level fixed effect (Tables 2, 3). The subadult spider model included average  
336 degree (predictor weight 47%), as the group or subgroup-level fixed effect, and maximum  
337 boldness (predictor weight 97%), as the individual-level fixed effect (Tables 2, 4).

338 Network measures impacted collective prey attack in groups of adult spiders. Adult  
339 spider groups that were overall more connected (high average degree) attacked the prey  
340 stimulus more quickly. This relationship was found only for resting networks observed  
341 immediately before testing collective prey attack, but not for networks measured earlier  
342 (Table 3). At the level of the individual, when the groups' boldest (keystone) individual was  
343 more closely connected to all other individuals (closeness centrality), prey attack was  
344 slower. This relationship between prey attack and the closeness centrality of the boldest  
345 individual was retained for resting networks obtained two days prior to prey attack (Table  
346 3).

347 No relationship between the network measure average degree and attack speed was  
348 found for the groups of subadult spiders (Tables 4). We also ran an alternative model that  
349 included degree of keystone as a second individual-level, network effect (predictor weight  
350 52%) but this was also not significant (Table S6). However, the boldness of the boldest  
351 individual in the group, i.e., the keystone's boldness, significantly reduced latency to attack  
352 i.e., groups with a bolder keystone attacked more quickly (Table 4).

353 In the adult spiders, the boldness of the boldest (keystone) individual was not  
354 associated with its degree in the before-prey resting network (Pearson's correlation:  $r =$   
355  $0.039$ ,  $t = 0.428$ ,  $df = 118$ ,  $p = 0.670$ ), or its closeness (Pearson's correlation:  $r = -0.007$ ,  $t = -$   
356  $0.074$ ,  $df = 118$ ,  $p\text{-value} = 0.941$ ). This was also the case for the subadults' boldest spiders  
357 and their degree (Pearson's correlation:  $r = -0.212$ ,  $t = -1.837$ ,  $df = 72$ ,  $p\text{-value} = 0.070$ ) and  
358 closeness (Pearson's correlation:  $r = -0.069$ ,  $t = -0.5909$ ,  $df = 72$ ,  $p = 0.556$ ). There was high  
359 turnover in the role of keystone (boldest) individual in both in the adult ( $4.38 \pm 0.68$ , mean  
360  $\pm$  standard deviation) and subadult ( $5.67 \pm 0.87$ ) groups (number of different individuals in

361 the role out of a maximum of 7). There was a significant difference between the adult and  
362 subadult distributions of keystone turnover (Wilcoxon rank sum test:  $W=230$ ,  $p=0.0003$ ).

363         Keystone individuals participated in 7-29% of prey attacks. In the adult groups on the  
364 first week, 24 trials resulted in 21 prey attacks. 17 of these attacking groups had a keystone  
365 individual (the remainder of the groups were set up as all-shy individuals), and 5 (29.4%) of  
366 the attacks by these groups included the keystone individual. In contrast, on weeks 2-6, 73  
367 of 120 trials resulted in prey attacks. In 70 of these groups there was an individual that had  
368 the highest boldness (i.e., was a keystone), and in only 5 (7.1%) of these groups, the  
369 keystone individual participated in the prey attack. This decrease in keystone participation  
370 in prey attack after week 1 is consistent with previous findings (Figure S2 of Pruitt and  
371 Pinter-Wollman 2015). In the subadult groups, on the first week, 15 trials resulted in 12 prey  
372 attacks and only in one (8.3%) of these attacks a keystone individual participated. In weeks  
373 2-6, there were 75 trials, 56 resulting in prey attack, 4 (7.1%) of which had keystone  
374 participation.

375

## 376 **Discussion**

377         The structure of resting interaction networks measured immediately before prey  
378 attack predicted the attack speed of adult social spiders. Higher overall connectivity  
379 (average degree), a group-level measure, led to faster attack, though only in the resting  
380 interactions measured pre-stimulus. Furthermore, the more connected to others (greater  
381 closeness centrality) was the boldest individual (keystone), the slower the collective prey  
382 attack speeds, when considering both the networks observed immediately and two days  
383 prior to the prey attack. Therefore, the social connectivity of the keystone to the rest of its  
384 group, but not its boldness, was found to be significant in groups of adults. The opposite



385 finding was observed for the subadult spiders: groups with a bolder keystone individual  
386 attacked the prey stimulus more quickly, but we did not detect any significant associations  
387 between subadult resting network measures and attack speeds. These findings support our  
388 hypothesis that subadult spiders will rely on behavioural traits likely because younger  
389 animals are often more behaviourally plastic than adults (Scott 1962). Our results further  
390 support the hypothesis that adult groups rely on social interactions more than on  
391 behavioural changes to modify collective dynamics. We also found that the individual-level  
392 predictor had a noticeably higher predictor weight compared to the group-level predictor in  
393 both the adults and subadults: 81% vs 46% in the adults, and 97% vs 47% in the subadults  
394 (Table 3). This seems to confirm the relevance of the ‘keystone individual’ concept in this  
395 species.

396 Influential ‘keystone’ individuals in social groups have a large effect on their social  
397 environment relative to their abundance (Modlmeier et al. 2014b). While this influence can  
398 be mediated through the behavioural traits of the keystone individual, it may also depend  
399 on its social interactions. Here we found that the behavioural traits of the keystone are not  
400 the only feature that impacts group success. When the boldest individual in an adult spider  
401 group had a lower closeness, i.e., was less connected with other resting spiders, the colony  
402 attacked prey more quickly. Thus, we find that the impact of the keystone’s defining trait –  
403 high boldness – was mediated by its interactions with the rest of the social group. Other  
404 studies define keystone individuals according to their centrality in an interaction network  
405 (Lusseau and Newman 2004; Vital and Martins 2013; Modlmeier et al. 2014b) and deem  
406 central individuals as critical for the stability of their society. Our findings suggest that *both*  
407 the behavioural traits and role in the social network should be considered when defining  
408 keystone individuals in some contexts. The boldness of the keystone individuals was not

409 associated with network closeness or degree in either adults or subadults, which suggests  
410 that centrality in an interaction network is not merely a direct consequence of individual  
411 behavioural characteristics but may result from a different process.

412 Our results suggest that a keystone individual affects group dynamics either through  
413 its own behaviour, or through influencing the formation and dissolution of social  
414 interactions. We found low direct participation of keystone individuals in prey attacks (7-  
415 29%), which is similar to keystone participation seen in other studies of this system (Pruitt  
416 and Pinter-Wollman 2015). Direct keystone participation in prey attack is most common  
417 during the first three days after *S. dumicola* colony establishment (Pruitt and Pinter-  
418 Wollman 2015) or after a new boldest individual is introduced (Pinter-Wollman et al.  
419 2017b). keystones rarely participate in prey capture directly in established colonies (Pruitt  
420 and Keiser 2014). Seismic recruitment signals have been indicated in *S. sarasinorum* (Bradoo  
421 1980) and other spider genera such as *Theridion saxatile* (Norgaard 1956). Likewise, adult *S.*  
422 *dumicola* are observed to catalyse foraging participation by juvenile spiders without  
423 becoming directly involved (Modlmeier et al. 2015). Thus, faster attack speeds may result  
424 from keystone individuals signalling information to the rest of the group about the presence  
425 of prey through, for example, vibrations on the web. Such signalling does not necessarily  
426 require physical proximity, only connection through the capture web, thus it is consistent  
427 with the peripheral position of the keystone individual in the proximity networks. In  
428 addition, the observed fast attacks in groups with high connectivity that we observed could  
429 point to another mechanism underlying the effects of interactions on behaviour. Recent  
430 work shows that in this study system boldness is impacted by proximity interactions (Hunt  
431 et al. 2018). Thus, it is possible that individuals in groups with high connectivity have more

432 opportunities to modify each other's behaviour and shape overall group boldness

433 composition, which impacts prey attack.

434           Interaction patterns had effects on collective outcomes depending on when they  
435 occurred. The closeness of the keystone was a significant predictor of attack speed up to  
436 two days before the stimulus. This effect duration may be a result of persistence in  
437 occupying certain social roles in the interaction network or, as previous research indicates,  
438 because keystone spiders have legacy effects on their social environment (Pruitt and Pinter-  
439 Wollman 2015). A keystone individual's long-term influence on its group can result from  
440 influencing the behaviour of others or their interactions. For example, in primates the  
441 removal of certain individuals who engage in policing behaviour affects the group's social  
442 network structure, even in situations, such as play, in which the removed individuals did not  
443 participate (Flack et al. 2006). *S. dumicola* colonies containing bolder keystones attack with  
444 more spiders, even after the keystone has been removed, suggesting that keystone  
445 individuals shape the overall structure of the social network, and/or change the group  
446 members' individual characteristics (Pruitt and Pinter-Wollman 2015). The lack of  
447 relationship between the boldness of the boldest individual in the group and prey attack  
448 speed in the adults, could be due to these long-term effects and the dynamics of boldness  
449 that we observed. It is possible that it is the boldness of the boldest individual many days  
450 before the prey attack that has the largest impact on group dynamics, rather than the  
451 boldness of the currently boldest individual. Bold spiders may actively contribute to a  
452 process of social niche construction, whereby repeated social interactions reinforce and  
453 enhance inter-individual differences in behaviour such as boldness and prey attack speed  
454 (Laskowski and Pruitt 2014).

455           The impact of overall group connectivity (average degree) on the adult spiders'  
456 response to prey suggests that most group members have a role to play in coordinating  
457 collective predation, even without needing to participate directly in prey attack. For  
458 instance, the presence of fellow colony members may catalyse increased foraging  
459 aggressiveness in individuals that are already predisposed to participate in prey capture  
460 (e.g., bold individuals (Wright et al. 2015, 2016)). Such catalytic effects have been observed  
461 in the context of nightly web repair in *S. dumicola* (Keiser et al. 2016). Furthermore, group  
462 level interactions impacted collective prey attack only on a short-time scale. The significant  
463 effect of group connectivity (average degree) immediately before, but not two and four  
464 days prior to prey capture on its speed, suggests that group level measures are important  
465 for immediate dynamics, such as the coordination of motion during prey capture (Krafft and  
466 Pasquet 1991). For example, it is possible that spatial proximity between individuals  
467 facilitates more rapid information through vibrations or allows individuals to better  
468 distinguish vibrations from prey and vibrations from colony mates. Such immediate effects  
469 of social connectivity are consistent with observations that small and confined artificial nest  
470 scaffolds facilitate rapid prey capture (Modlmeier et al. 2014a). Tighter proximity among  
471 group members may increase the frequency of social interactions among all group members  
472 (Modlmeier et al. 2014a). Future work on the impact of nest architecture on social  
473 interactions could uncover a potential mechanism underlying social interaction patterns  
474 (Pinter-Wollman et al. 2017a).

475           If individuals are behaviourally flexible, the group may be less reliant on social  
476 interactions to coordinate activities. Subadult spider groups attacked the prey stimulus  
477 more quickly if they had a bolder keystone individual, however, no association was found  
478 between their resting networks and attack speeds. These findings are consistent with

479 previous work showing that groups with bolder keystones attack prey faster and with more  
480 attackers (Keiser and Pruitt 2014). The lower importance of social network structure in  
481 subadults compared with adult spider groups could be related to greater behavioural  
482 plasticity in the subadults. In a new social environment *Stegodyphus* spiders show higher  
483 within-individual variation in boldness before becoming more behaviourally consistent with  
484 time (Laskowski and Pruitt 2014; Modlmeier et al. 2014c; Laskowski et al. 2016). Earlier  
485 developmental stages show more behavioural flexibility in a variety of animal systems  
486 (Stamps and Groothuis 2010). Here we found high turnover in keystone identity in both  
487 adults and subadults, with higher turnover in the subadults. Because adult spiders are  
488 perhaps more constrained in adjusting their behavioural traits, they may be more reliant on  
489 social interactions to achieve a beneficial group-level behavioural phenotype, because who  
490 interacts with whom can be changed more easily. Thus, effective group-level hunting  
491 behaviour, which is a key function of sociality in social spiders (Whitehouse and Lubin 2005),  
492 could depend on a balance between the plasticity of individual-level behavioural traits and  
493 the ease of modifying social interactions (Pinter-Wollman et al. 2016), which may vary  
494 according to developmental stage.

495         Finally, group size may have played a role in the differences we observed between  
496 adult and subadult groups. In our experiments, adult groups had 10 individuals and  
497 subadults 26-30 and so development stage and group size are not independent of each  
498 other in this study. Individuals in smaller groups have been found to participate more in  
499 collective prey capture, probably as a consequence of necessity rather than a change in  
500 behaviour (Wright et al. 2015). Thus, it is possible that, if not all individuals are required for  
501 prey capture in large groups, interactions among all group members are less important than  
502 in small groups. Furthermore, larger groups are more likely to contain skilled or experienced

503 individuals, assuming they have greater diversity in ability or experience; this is referred to  
504 as the ‘pool of competence’ hypothesis (Morand-Ferron and Quinn 2011). However,  
505 subadults are all likely equally inexperienced and unskilled at hunting and so variation in  
506 experience in a large group may not be a suitable explanation for the differences we  
507 observed between the adult and subadult groups. Finally, the containers occupied by  
508 subadults were somewhat larger than those of the adults (to accommodate the larger  
509 number of individuals). However, subadult group members tended to all cluster in one small  
510 area and not utilize more space than the adult spiders in their smaller containers.  
511 Therefore, we expect group size to have a smaller impact on the differences between  
512 subadult and adult groups than the difference in developmental stage.

513

## 514 **Conclusion**

515 Our study shows that social interactions are important in determining the speed of  
516 collective predation in social spiders and that the impact of interactions may differ  
517 according to developmental stage, time scale, and level of social organization.  
518 Developmental stages may vary in the importance of social interactions versus shifts in  
519 individuals’ behavioural tendencies (Pinter-Wollman et al. 2016). Furthermore, different  
520 types of interactions on different social organizational levels may vary in the duration of  
521 their effects. For example, we found that an individual-based network measure had longer  
522 lasting effects than a group-level measure. Finally, our results indicate that the social role of  
523 keystone individuals within a group can have a longer-term effect on collective hunting  
524 success. This finding emphasizes the importance of observing both the social structure of  
525 individuals in a group and noting inter-individual differences in personality characteristics,  
526 for understanding the success of some animal societies. Although keystone individuals can

527 occupy a wide variety of roles across different taxa (Modlmeier et al. 2014b), our work  
528 suggests that a combination of network and behavioural trait characteristics could provide a  
529 more precise definition of keystones in many contexts in future work.  
530

531 **Acknowledgements**

532 We thank the South Africa Department of Tourism, Environment, and Conservation for  
533 providing permits for animal collection (FAUNA 1072/2013 and 1691/2015) and Colin  
534 Wright and James Lichtenstein for collecting spiders in the field. We further thank  
535 Arne Henningsen for guidance on the 'censReg' R package.

536 **Data availability**

537 The datasets generated and analysed during the study will be available in an online data  
538 repository upon acceptance of the paper.

539 **Funding**

540 This work was supported by the National Science Foundation IOS grants 1456010 to NPW  
541 and 1455895 to JNP, and National Institutes of Health grant GM115509 to NPW and JNP.

542 **Author contributions**

543 ERH analyzed the data and drafted the manuscript, NPW and JNP designed the study, BM,  
544 RG, CF, BW, and NPW collected the data, and all authors contributed to the final version of  
545 the manuscript.

546

547 **References**

- 548 Bansal S, Grenfell BT, Meyers LA, 2007. When individual behaviour matters: homogeneous  
549 and network models in epidemiology. *J Roy Soc Interface* 4:879-891. doi:  
550 10.1098/rsif.2007.1100.
- 551 Bednarz JC, 1988. Cooperative hunting in Harris' hawks (*Parabuteo unicinctus*). *Science*  
552 239:1525.
- 553 Bell AM, Hankison SJ, Laskowski KL, 2009. The repeatability of behaviour: a meta-analysis.  
554 *Anim Behav* 77:771-783. doi: 10.1016/j.anbehav.2008.12.022.
- 555 Bilde T, Coates KS, Birkhofer K, Bird T, Maklakov AA, Lubin Y, Aviles L, 2007. Survival benefits  
556 select for group living in a social spider despite reproductive costs. *J Evol Biol*  
557 20:2412-2426. doi: 10.1111/j.1420-9101.2007.01407.x.
- 558 Biro PA, Stamps JA, 2008. Are animal personality traits linked to life-history productivity?  
559 *Trends Ecol Evol* 23:361-368. doi: 10.1016/j.tree.2008.04.003.
- 560 Blonder B, Wey TW, Dornhaus A, James R, Sih A, 2012. Temporal dynamics and network  
561 analysis. *Methods Ecol Evol* 3:958-972. doi: 10.1111/j.2041-210X.2012.00236.x.



- 562 Boesch C, 2002. Cooperative hunting roles among tai chimpanzees. *Hum Nature* 13:27-46.  
563 doi: 10.1007/s12110-002-1013-6.
- 564 Bradoo B, 1980. Feeding behaviour and recruitment display in the social spider *Stegodyphus*  
565 *sarasinorum* Karsch (Araneae, Eresidae). *Tijdschrift voor entomologie* 123.
- 566 Brandes U, Dellling D, Gaertler M, Gorke R, Hoefer M, Nikoloski Z, Wagner D, 2008. On  
567 Modularity Clustering. *IEEE Trans Knowl Data Eng* 20:172-188. doi:  
568 10.1109/TKDE.2007.190689.
- 569 Brown C, Irving E, 2014. Individual personality traits influence group exploration in a feral  
570 guppy population. *Behav Ecol* 25:95-101. doi: DOI 10.1093/beheco/art090.
- 571 Burnham KP, Anderson DR, 2002. Model selection and multimodel inference, 2nd edn.  
572 Springer, New York.
- 573 Burnham KP, Anderson DR, Huyvaert KP, 2011. AIC model selection and multimodel  
574 inference in behavioral ecology: some background, observations, and comparisons.  
575 *Behav Ecol Sociobiol* 65:23-35. doi: 10.1007/s00265-010-1029-6.
- 576 Conradt L, Roper TJ, 2003. Group decision-making in animals. *Nature* 421:155-158. doi:  
577 10.1038/Nature01294.
- 578 Creel S, Creel NM, 1995. Communal hunting and pack size in African wild dogs, *Lycaon*  
579 *pictus*. *Animal Behaviour* 50:1325-1339. doi: 10.1016/0003-3472(95)80048-4.
- 580 Firth JA, Voelkl B, Farine DR, Sheldon BC, 2015. Experimental Evidence that Social  
581 Relationships Determine Individual Foraging Behavior. *Curr Biol* 25:3138-3143. doi:  
582 10.1016/j.cub.2015.09.075.
- 583 Flack JC, Girvan M, de Waal FBM, Krakauer DC, 2006. Policing stabilizes construction of  
584 social niches in primates. *Nature* 439:426-429. doi: 10.1038/nature04326.
- 585 Fox J, Monette G, 1992. Generalized Collinearity Diagnostics. *J Am Stat Assoc* 87:178-183.  
586 doi: 10.1080/01621459.1992.10475190.
- 587 Fox J, Weisberg S, 2011. *An R Companion to Applied Regression, Second Edition*. Thousand  
588 Oaks CA: Sage.
- 589 Grinsted L, Pruitt JN, Settepani V, Bilde T, 2013. Individual personalities shape task  
590 differentiation in a social spider. *Proc Roy Soc B* 280. doi: 10.1098/rspb.2013.1407.
- 591 Guevara J, Gonzaga MO, Vasconcellos-Neto J, Avilés L, 2011. Sociality and resource use:  
592 insights from a community of social spiders in Brazil. *Behav Ecol* 22:630-638. doi:  
593 10.1093/beheco/arr022.
- 594 Harwood G, Avilés L, 2013. Differences in group size and the extent of individual  
595 participation in group hunting may contribute to differential prey-size use among  
596 social spiders. *Biol Lett* 9. doi: 10.1098/rsbl.2013.0621.
- 597 Hedrick AV, Kortet R, 2012. Sex differences in the repeatability of boldness over  
598 metamorphosis. *Behav Ecol Sociobiol* 66:407-412. doi: 10.1007/s00265-011-1286-z.
- 599 Hedrick AV, Riechert SE, 1989. Genetically-based variation between two spider populations  
600 in foraging behavior. *Oecologia* 80:533-539. doi: 10.1007/bf00380078.
- 601 Henningsen A, 2017. *censReg: Censored Regression (Tobit) Models*.
- 602 Henschel JR, Lubin YD, Schneider J, 1995. Sexual competition in an inbreeding social spider,  
603 *Stegodyphus dumicola* (Araneae: Eresidae). *Insectes Soc* 42:419-426. doi:  
604 10.1007/BF01242170.
- 605 Holekamp KE, Smith JE, Strelhoff CC, Van Horn RC, Watts HE, 2012. Society, demography and  
606 genetic structure in the spotted hyena. *Mol Ecol* 21:613-632. doi: 10.1111/j.1365-  
607 294X.2011.05240.x.

- 608 Hunt ER, Mi B, Fernandez C, Wong BM, Pruitt JN, Pinter-Wollman N, 2018. Social  
609 interactions shape individual and collective personality in social spiders. *Proc Roy Soc*  
610 *B* 285. doi: 10.1098/rspb.2018.1366.
- 611 Jandt JM, Bengston S, Pinter-Wollman N, Pruitt JN, Raine NE, Dornhaus A, Sih A, 2014.  
612 Behavioural syndromes and social insects: personality at multiple levels. *Biol Rev*  
613 89:48-67. doi: Doi 10.1111/Brv.12042.
- 614 Junghanns A, Holm C, Schou MF, Sørensen AB, Uhl G, Bilde T, 2017. Extreme allomaternal  
615 care and unequal task participation by unmated females in a cooperatively breeding  
616 spider. *Anim Behav* 132:101-107. doi: 10.1016/j.anbehav.2017.08.006.
- 617 Keiser CN, Jones DK, Modlmeier AP, Pruitt JN, 2014. Exploring the effects of individual traits  
618 and within-colony variation on task differentiation and collective behavior in a desert  
619 social spider. *Behav Ecol Sociobiol* 68:839-850. doi: DOI 10.1007/s00265-014-1696-9.
- 620 Keiser CN, Pruitt JN, 2014. Personality composition is more important than group size in  
621 determining collective foraging behaviour in the wild. *Proc Roy Soc B* 281:20141424.  
622 doi: 10.1098/rspb.2014.1424.
- 623 Keiser CN, Wright CM, Pruitt JN, 2016. Increased bacterial load can reduce or negate the  
624 effects of keystone individuals on group collective behaviour. *Anim Behav* 114:211-  
625 218. doi: 10.1016/j.anbehav.2016.02.010.
- 626 Krafft B, Pasquet A, 1991. Synchronized and rhythmical activity during the prey capture in  
627 the social spider *Anelosimus eximius* (Araneae, Theridiidae). *Insectes Soc* 38:83-90.  
628 doi: 10.1007/bf01242716.
- 629 Krause J, Croft DP, James R, 2007. Social network theory in the behavioural sciences:  
630 potential applications. *Behav Ecol Sociobiol* 62:15-27.
- 631 Krause J, James R, Croft DP, 2010. Personality in the context of social networks. *Philos Trans*  
632 *Roy Soc B* 365:4099-4106. doi: 10.1098/rstb.2010.0216.
- 633 Krause J, James R, Franks DW, Croft DP, 2015. *Animal social networks*: Oxford University  
634 Press, USA.
- 635 Krause J, Ruxton GD, 2002. *Living in groups*: Oxford University Press.
- 636 Kurvers RHJM, Krause J, Croft DP, Wilson ADM, Wolf M, 2014. The evolutionary and  
637 ecological consequences of animal social networks: emerging issues. *Trends Ecol*  
638 *Evol* 29:326-335. doi: 10.1016/j.tree.2014.04.002.
- 639 Laskowski KL, Montiglio P-O, Pruitt JN, 2016. Individual and Group Performance Suffers from  
640 Social Niche Disruption. *Am Nat* 187:776-785. doi: 10.1086/686220.
- 641 Laskowski KL, Pruitt JN, 2014. Evidence of social niche construction: persistent and repeated  
642 social interactions generate stronger personalities in a social spider. *Proc Roy Soc B*  
643 281. doi: 10.1098/rspb.2013.3166.
- 644 Lichtenstein JL, Wright CM, Lusciuskie LP, Montgomery GA, Pinter-Wollman N, & Pruitt JN,  
645 2017. Participation in cooperative prey capture and the benefits gained from it are  
646 associated with individual personality. *Curr Zool*, 63(5): 561-567. doi:  
647 10.1093/cz/zow097
- 648 Lloyd-Smith JO, Schreiber SJ, Kopp PE, Getz WM, 2005. Superspreading and the effect of  
649 individual variation on disease emergence. *Nature* 438:355-359. doi:  
650 10.1038/Nature04153.
- 651 Lusseau D, Newman MEJ, 2004. Identifying the role that animals play in their social  
652 networks. *Proc Roy Soc B*:S477-481. doi: 10.1098/rsbl.2004.0225.
- 653 McDonald DB, 2007. Predicting fate from early connectivity in a social network. *Proc Nat*  
654 *Acad Sci* 104:10910-10914. doi: 10.1073/pnas.0701159104.

- 655 Modlmeier AP, Forrester NJ, Pruitt JN, 2014a. Habitat structure helps guide the emergence  
656 of colony-level personality in social spiders. *Behav Ecol Sociobiol* 68:1965-1972. doi:  
657 10.1007/s00265-014-1802-z.
- 658 Modlmeier AP, Keiser CN, Watters JV, Sih A, Pruitt JN, 2014b. The keystone individual  
659 concept: an ecological and evolutionary overview. *Anim Behav* 89:53-62.
- 660 Modlmeier AP, Laskowski KL, Brittingham HA, Coleman A, Knutson KA, Kuo C, McGuirk M,  
661 Zhao K, Keiser CN, Pruitt JN, 2015. Adult presence augments juvenile collective  
662 foraging in social spiders. *Anim Behav* 109:9-14. doi:  
663 10.1016/j.anbehav.2015.07.033.
- 664 Modlmeier AP, Laskowski KL, DeMarco AE, Coleman A, Zhao K, Brittingham HA, McDermott  
665 DR, Pruitt JN, 2014c. Persistent social interactions beget more pronounced  
666 personalities in a desert-dwelling social spider. *Biol Lett* 10. doi:  
667 10.1098/rsbl.2014.0419.
- 668 Morand-Ferron J, Quinn JL, 2011. Larger groups of passerines are more efficient problem  
669 solvers in the wild. *Proc Nat Acad Sci* 108:15898-15903. doi:  
670 10.1073/pnas.1111560108.
- 671 Norgaard E, 1956. Environment and Behaviour of *Theridion Saxatile*. *Oikos* 7:159-192. doi:  
672 10.2307/3564917.
- 673 O'Brien RM, 2007. A Caution Regarding Rules of Thumb for Variance Inflation Factors. *Qual*  
674 *Quant* 41:673-690. doi: 10.1007/s11135-006-9018-6.
- 675 Pasquet A, Krafft B, 1992. Cooperation and Prey Capture Efficiency in a Social Spider,  
676 *Anelosimus eximius* (Araneae, Theridiidae). *Ethology* 90:121-133. doi:  
677 10.1111/j.1439-0310.1992.tb00826.x.
- 678 Pike TW, Samanta M, Lindstrom J, Royle NJ, 2008. Behavioural phenotype affects social  
679 interactions in an animal network. *Proc Roy Soc B* 275:2515-2520. doi:  
680 10.1098/rspb.2008.0744.
- 681 Pinter-Wollman N, 2012. Personality in social insects: How does worker personality  
682 determine colony personality? *Curr Zool* 58:580-588. doi: 10.1093/czoolo/58.4.580.
- 683 Pinter-Wollman N, Fiore SM, Theraulaz G, 2017a. The impact of architecture on collective  
684 behaviour. *Nat Ecol Evol*:0111. doi: DOI: 10.1038/s41559-017-0111.
- 685 Pinter-Wollman N, Hobson EA, Smith JE, Edelman AJ, Shizuka D, de Silva S, Waters JS, Prager  
686 SD, Sasaki T, Wittemyer G, Fewell J, McDonald DB, 2014. The dynamics of animal  
687 social networks: analytical, conceptual, and theoretical advances. *Behav Ecol*  
688 25:242–255.
- 689 Pinter-Wollman N, Hubler J, Holley J-A, Franks NR, Dornhaus A, 2012. How is activity  
690 distributed among and within tasks in *Temnothorax* ants? *Behav Ecol Sociobiol*  
691 66:1407-1420. doi: 10.1007/s00265-012-1396-2.
- 692 Pinter-Wollman N, Keiser CN, Wollman R, Pruitt JN, 2016. The Effect of Keystone Individuals  
693 on Collective Outcomes Can Be Mediated through Interactions or Behavioral  
694 Persistence. *Am Nat* 188:240-252. doi: 10.1086/687235.
- 695 Pinter-Wollman N, Mi B, Pruitt JN, 2017b. Replacing bold individuals has a smaller impact on  
696 group performance than replacing shy individuals. *Behav Ecol* 28:883-889. doi:  
697 10.1093/beheco/ax054.
- 698 Pinter-Wollman N, Wollman R, Guetz A, Holmes S, Gordon DM, 2011. The effect of  
699 individual variation on the structure and function of interaction networks in  
700 harvester ants. *J Roy Soc Interface* 8:1562-1573. doi: DOI 10.1098/rsif.2011.0059.

- 701 Pitman RL, Durban JW, 2012. Cooperative hunting behavior, prey selectivity and prey  
702 handling by pack ice killer whales (*Orcinus orca*), type B, in Antarctic Peninsula  
703 waters. *Marine Mamm Sci* 28:16-36. doi: 10.1111/j.1748-7692.2010.00453.x.
- 704 Pruitt JN, Keiser CN, 2014. The personality types of key catalytic individuals shape colonies'  
705 collective behaviour and success. *Anim Behav* 93:87-95.
- 706 Pruitt JN, Pinter-Wollman N, 2015. The legacy effects of keystone individuals on collective  
707 behaviour scale to how long they remain within a group. *Proc Roy Soc B* 282:89-96.  
708 doi: 10.1098/rspb.2015.1766.
- 709 Riechert SE, Hedrick AV, 1993. A test for correlations among fitness-linked behavioural traits  
710 in the spider *Agelenopsis aperta* (Araneae, Agelenidae). *Anim Behav* 46:669-675. doi:  
711 10.1006/anbe.1993.1243.
- 712 Robson SK, Traniello JFA, 1999. Key individuals and the organization of labor in ants. In:  
713 Detrain C, Deneubourg JL, Pasteels JM, editors. *Information processing in social*  
714 *insects* Basel Boston, Berlin: Birkhauser. p. 239-260.
- 715 Royle NJ, Pike TW, Heeb P, Richner H, Kolliker M, 2012. Offspring social network structure  
716 predicts fitness in families. *Proc Roy Soc B* 279:4914-4922. doi:  
717 10.1098/rspb.2012.1701.
- 718 Scott JP, 1962. Critical Periods in Behavioral Development. *Science* 138:949-958.
- 719 Seeley TD, 1982. Adaptive significance of the age polyethism schedule in honeybee colonies.  
720 *Behav Ecol Sociobiol* 11:287-293. doi: 10.1007/bf00299306.
- 721 Shizuka D, Chaine AS, Anderson J, Johnson O, Laursen IM, Lyon BE, 2014. Across-year social  
722 stability shapes network structure in wintering migrant sparrows. *Ecol Lett* 17:998-  
723 1007. doi: 10.1111/ele.12304.
- 724 Sih A, Bell A, Johnson JC, 2004. Behavioral syndromes: an ecological and evolutionary  
725 overview. *Trends Ecol Evol* 19:372-378. doi: DOI 10.1016/j.tree.2004.04.009.
- 726 Sih A, Hanser SF, McHugh KA, 2009. Social network theory: new insights and issues for  
727 behavioral ecologists. *Behav Ecol and Sociobiol* 63:975-988. doi: DOI  
728 10.1007/s00265-009-0725-6.
- 729 Stamps J, Groothuis TGG, 2010. The development of animal personality: relevance, concepts  
730 and perspectives. *Biol Rev* 85:301-325. doi: 10.1111/j.1469-185X.2009.00103.x.
- 731 Stander PE, 1992. Cooperative hunting in lions: the role of the individual. *Behav Ecol*  
732 *Sociobiol* 29:445-454. doi: 10.1007/bf00170175.
- 733 Symonds MRE, Moussalli A, 2011. A brief guide to model selection, multimodel inference  
734 and model averaging in behavioural ecology using Akaike's information criterion.  
735 *Behav Ecol Sociobiol* 65:13-21. doi: 10.1007/s00265-010-1037-6.
- 736 Tripet F, Nonacs P, 2004. Foraging for Work and Age-Based Polyethism: The Roles of Age  
737 and Previous Experience on Task Choice in Ants. *Ethology* 110:863-877. doi:  
738 10.1111/j.1439-0310.2004.01023.x.
- 739 Vital C, Martins EP, 2013. Socially-Central Zebrafish Influence Group Behavior More than  
740 Those on the Social Periphery. *PLOS ONE* 8:e55503. doi:  
741 10.1371/journal.pone.0055503.
- 742 Wey T, Blumstein DT, Shen W, Jordan F, 2008. Social network analysis of animal behaviour:  
743 a promising tool for the study of sociality. *Anim Behav* 75:333-344. doi: DOI  
744 10.1016/j.anbehav.2007.06.020.
- 745 Whitehouse MEA, Lubin Y, 1999. Competitive foraging in the social spider *Stegodyphus*  
746 *dumicola*. *Anim Behav* 58:677-688. doi: 10.1006/anbe.1999.1168.

- 747 Whitehouse MEA, Lubin Y, 2005. The functions of societies and the evolution of group living:  
748 spider societies as a test case. *Biol Rev* 80:347-361. doi:  
749 10.1017/S1464793104006694.
- 750 Wilson ADM, Krause J, 2012. Personality and metamorphosis: is behavioral variation  
751 consistent across ontogenetic niche shifts? *Behav Ecol* 23:1316-1323. doi:  
752 10.1093/beheco/ars123.
- 753 Witte V, Schliessmann D, Hashim R, 2010. Attack or call for help? Rapid individual decisions  
754 in a group-hunting ant. *Behav Ecol* 21:1040-1047. doi: 10.1093/beheco/arq100.
- 755 Wittemyer G, Douglas-Hamilton I, Getz WM, 2005. The socioecology of elephants: analysis  
756 of the processes creating multitiered social structures. *Anim Behav* 69:1357-1371.  
757 doi: 10.1016/j.anbehav.2004.08.018.
- 758 Wright CM, Keiser CN, Pruitt JN, 2015. Personality and morphology shape task participation,  
759 collective foraging and escape behaviour in the social spider *Stegodyphus dumicola*.  
760 *Anim Behav* 105:47-54. doi: 10.1016/j.anbehav.2015.04.001.
- 761 Wright CM, Keiser CN, Pruitt JN, 2016. Colony personality composition alters colony-level  
762 plasticity and magnitude of defensive behaviour in a social spider. *Anim Behav*  
763 115:175-183. doi: 10.1016/j.anbehav.2016.03.002.
- 764
- 765

766 **Figure captions**

767 **Fig. 1.** Close-up photograph of resting spiders in the first week of the experiment. The abdomen of  
768 each spider is marked uniquely with acrylic paint to track their behaviour over time. The resting  
769 network here corresponds to one connected chain (left) and one unconnected node (right).

770 **Fig. 2.** Interaction networks of three sample adult spider groups, immediately before prey attack  
771 speed was examined. Each node represents an individual spider and colour represents boldness –  
772 redder indicates higher boldness, with the boldest individual marked as a star. Lower keystone  
773 closeness and higher average degree are associated with faster latency to attack. Latencies to attack,  
774 average degree, and keystone closeness are noted below each network.

775

776 **Figures and Tables**

777

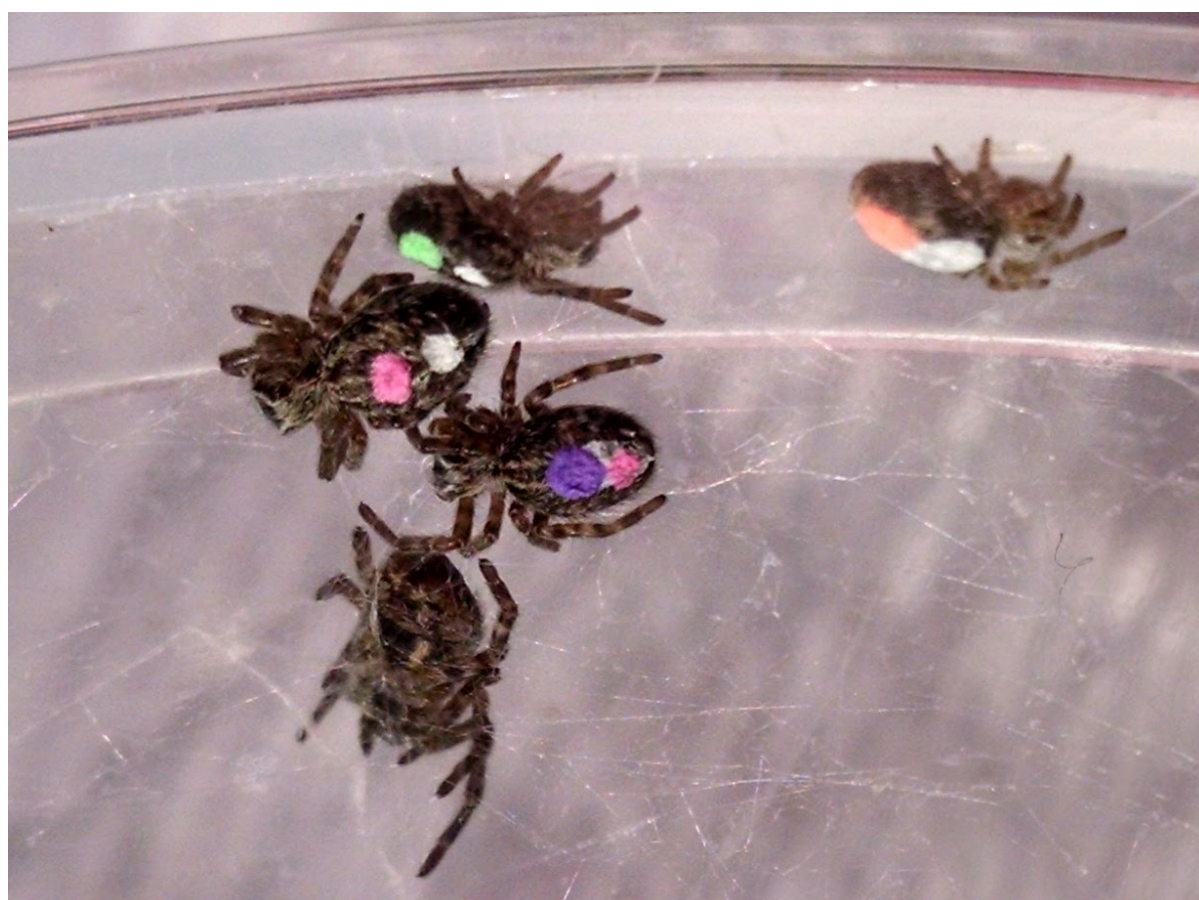

778

779

780

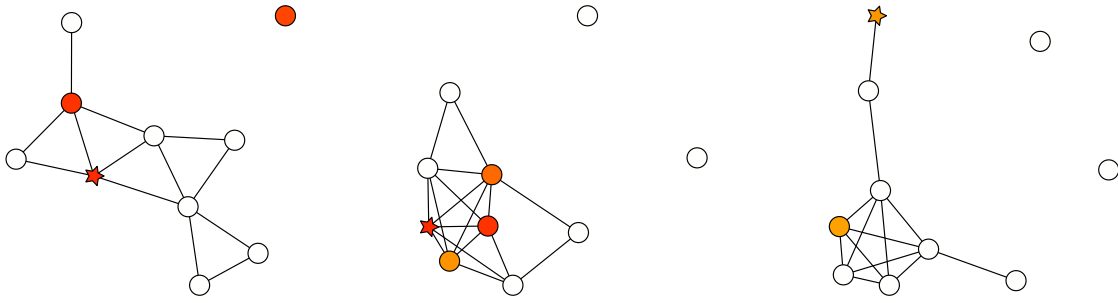

Latency to attack = 567s  
Average degree = 2.6  
Keystone closeness = 0.045

Latency to attack = 165s  
Average degree = 3.4  
Keystone closeness = 0.034

Latency to attack = 46s  
Average degree = 2.6  
Keystone closeness = 0.023

781

782

783

784

785

Table 1. Network measures examined

786

| Level of analysis | Network variable                | Description                                                                                                                                                                                                                                      |
|-------------------|---------------------------------|--------------------------------------------------------------------------------------------------------------------------------------------------------------------------------------------------------------------------------------------------|
| Individual        | Keystone degree                 | Number of individuals interacting with the boldest individual                                                                                                                                                                                    |
|                   | Keystone closeness              | The sum of reciprocal shortest paths from the boldest individual to all other nodes. Measures how well integrated an individual is in the overall network.                                                                                       |
|                   | Maximum boldness                | The boldness of the boldest (keystone) individual in the group for that week (not a network measure).                                                                                                                                            |
| Sub-group         | Modularity                      | The extent to which the network is divided into modules, measured by the ratio between links within a module and links outward to other modules. Modules were defined based on the Optimal Community Structure algorithm (Brandes et al., 2008). |
| Group             | Average degree                  | The average number of individuals that each individual interacts with. Quantifies overall network connectivity.                                                                                                                                  |
|                   | Skewness of degree distribution | The skewness of the degree distribution. Larger absolute values indicate that degree is less evenly distributed among individuals in the group.                                                                                                  |

787

788

789

790 Table 2. The Akaike weights for the attack speed predictors, as calculated across all possible models  
 791 (see Tables S3 and S4). The top two predictors are selected for the final models, one individual and  
 792 one group or subgroup level.

| Level of analysis | Network variable                | Predictor weights |             |
|-------------------|---------------------------------|-------------------|-------------|
|                   |                                 | Adults            | Subadults   |
| Individual        | Keystone degree                 | 0.14              | 0.52        |
|                   | Keystone closeness              | <b>0.81</b>       | 0.15        |
|                   | Maximum boldness                | 0.29              | <b>0.97</b> |
| Subgroup          | Modularity                      | 0.36              | 0.42        |
| Group             | Average degree                  | <b>0.46</b>       | <b>0.47</b> |
|                   | Skewness of degree distribution | 0.06              | 0.18        |

800

801 Table 3. Statistics of the selected model for attack speed in adult spiders. \*denotes significance at p  
 802 < 0.05. See Table S2 for information on random effects and t values.

| Level of Analysis | Coefficient           | Days before | Estimate log(seconds) | Standard error | p              |
|-------------------|-----------------------|-------------|-----------------------|----------------|----------------|
| Individual        | Closeness of keystone | 4           | 10.715                | 6.682          | 0.109          |
|                   |                       | 2           | 12.766                | 6.269          | <b>0.042*</b>  |
|                   |                       | 0           | 18.842                | 7.205          | <b>0.0089*</b> |
| Group             | Average degree        | 4           | -0.172                | 0.129          | 0.182          |
|                   |                       | 2           | -0.239                | 0.150          | 0.111          |
|                   |                       | 0           | -0.367                | 0.175          | <b>0.036*</b>  |

810 Table 4. Statistics of the selected model for attack speed in subadult spiders. \*denotes significance  
 811 at p < 0.05. See Table S4 for information on random effects and t values.

812

| Level of Analysis | Coefficient      | Days before | Estimate log(seconds) | Standard error | p                  |
|-------------------|------------------|-------------|-----------------------|----------------|--------------------|
| Individual        | Maximum boldness | 4           | -0.0050               | 0.0015         | <b>&lt; 0.001*</b> |
|                   |                  | 2           | -0.0049               | 0.0016         | <b>0.002*</b>      |
|                   |                  | 0           | -0.0053               | 0.0016         | <b>&lt; 0.001*</b> |
| Group             | Average degree   | 4           | 0.005                 | 0.0247         | 0.8318             |
|                   |                  | 2           | -0.041                | 0.0314         | 0.1819             |
|                   |                  | 0           | -0.025                | 0.0245         | 0.317              |
